# Supplementary material
Source: ML conference proceedings conference paper supplement (https://openaccess.thecvf.com/content/ICCV_2017/html/Bao_CVAE-GAN_Fine-Grained_Image_ICCV_2017_paper.html)
Supplement: Supplementary file 1 [file Bao_CVAE-GAN_Fine-Grained_Image_ICCV_2017_supplemental.pdf]

Archive with 2 entries (2 files):
- CVAE_GAN_supple_final.pdf
- CVAE-GAN_video_demo.mp4
